# Supplementary material for: Prenatal Diagnosis of Talipes Equinovarus by Ultrasound and Chromosomal Microarray Analysis: A Chinese Single-Center Retrospective Study
Source: MDPI journal article supplement (doi:10.3390/genes13091573), 2022-09-01
Supplement: s1 [file s1]

**Supplementary Table S1.** Clinical characteristics of TE fetuses with VOUS.

| Case | Maternal Age (Years) | GA (Weeks) | Ultrasound Findings  | CMA Results                                                                 | Type of CNV                | Size (Mb)    | Outcome    |
|------|----------------------|------------|----------------------|-----------------------------------------------------------------------------|----------------------------|--------------|------------|
| 1    | 23.4                 | 26         | Isolated TE          | arr3q22.1(132298557-132647420) × 3<br>arr12q24.33(132026536-132278530) × 3  | Duplication<br>Duplication | 0.35<br>0.25 | TOP        |
| 2    | 24.5                 | 23.9       | Isolated TE          | arr5p15.33(987,177-1,226,807) × 3<br>arr20q11.21(29,652,121-29,917,507) × 3 | Duplication<br>Duplication | 0.24<br>0.27 | Live birth |
| 3    | 23.9                 | 25.1       | Isolated TE          | arr1p36.33(1439390-1652893) × 1                                             | Deletion                   | 0.21         | Live birth |
| 4    | 38.1                 | 19.0       | Isolated TE          | arr17p11.2(16581523-16807265) × 3                                           | Duplication                | 0.23         | Live birth |
| 5    | 29.2                 | 24.2       | Isolated TE          | arr2q12.2q13(107,032,426-111,365,996) × 3                                   | Duplication                | 4.33         | Live birth |
| 6    | 34.7                 | 23.3       | Isolated TE          | arr4p14(36142523-36837111) × 3<br>arr18p11.31(4002199-4204376) × 1          | Duplication Deletion       | 0.70<br>0.20 | Live birth |
| 7    | 29.8                 | 24.1       | Isolated TE          | arr2q24.3(165,696,963-165,828,391) × 3                                      | Duplication                | 0.13         | Live birth |
| 8    | 26.6                 | 22.1       | Isolated TE          | arr1q31.1q31.2(190226234-191271408) × 3                                     | Duplication                | 1.05         | Live birth |
| 9    | 22.9                 | 29.6       | Isolated TE          | arr14q13.1(34296645-34642068) × 3                                           | Duplication                | 0.36         | Live birth |
| 10   | 28.7                 | 32.1       | Isolated TE          | arr8p23.1(11279747-11591196) × 3                                            | Duplication                | 0.31         | Live birth |
| 11   | 26.8                 | 23.1       | Isolated TE          | arr11q14.3(89,501,939-90,086,182) × 4                                       | Duplication                | 0.58         | Live birth |
| 12   | 33.5                 | 22.4       | Isolated TE          | arr4p14(39,846,353-40,130,593) × 3                                          | Duplication                | 0.28         | Live birth |
| 13   | 30.4                 | 24.4       | Isolated TE          | arr5q12.1(59,212,189-59,494,303) × 1                                        | Deletion                   | 0.28         | Live birth |
| 14   | 34.2                 | 24.0       | Isolated TE          | arr15q26.3(99,521,882-100,158,444) × 3                                      | Duplication                | 0.64         | TOP        |
| 15   | 29.8                 | 24.9       | Isolated TE          | arr21q22.3(47028160-47533226) × 3                                           | Duplication                | 0.51         | Live birth |
| 16   | 33.0                 | 24.3       | Isolated TE          | arr8p23.2(3685301-5935671) × 4                                              | Duplication                | 2.25         | Live birth |
| 17   | 37.1                 | 25.9       | Isolated TE          | arr16q23.1(75,276,258-75,612,925) × 3                                       | Deletion                   | 0.27         | TOP        |
| 18   | 24.9                 | 25.4       | Isolated TE          | arrXp11.23(47,707,712-48,261,360) × 2                                       | Duplication                | 0.55         | TOP        |
| 19   | 28.7                 | 24.1       | Isolated TE          | arr8q24.11(118,226,133-118,884,778) × 3                                     | Duplication                | 0.66         | Live birth |
| 20   | 29.6                 | 31.1       | TE; widened CSP      | arr5p13.2(33951000-34157068) × 1                                            | Deletion                   | 0.21         | LFU        |
| 21   | 34.2                 | 19.3       | TE; spina bifida     | arr2q12.2q12.3(106872677-108533926) × 3<br>arr3p25.2(12594564-12826919) × 3 | Duplication<br>Duplication | 1.66<br>0.32 | TOP        |
| 22   | 30.8                 | 31.3       | TE; polyhydramnios   | arr12q23.3(104,573,529-104,797,526) × 3                                     | Duplication                | 0.22         | TOP        |
| 23   | 37.8                 | 24.7       | TE; omphalocele      | arr6q25.3(158,499,583-158,761,112) × 3                                      | Duplication                | 0.26         | TOP        |
| 24   | 29.3                 | 24.4       | TE; FGR              | arr7p22.3(1976262-2246007) × 1                                              | Deletion                   | 0.27         | TOP        |
| 25   | 27.7                 | 13.3       | TE; meningomyelocele | arr8q22.2(100137795-100557343) × 1                                          | Deletion                   | 0.42         | TOP        |

TE: talipes equinovarus; GA: gestational age; CNVs: copy number variations; TOP: termination of pregnancy; CSP: cove of septum pellucidum; LFU: lost to follow-up; FGR: fetal growth restriction.
